# Supplementary material
Source: Springer Nature journal article supplement (https://www.springermedizin.de/resource/supplementary/12936_2008_670_MOESM7_ESM.pdf/9547964)

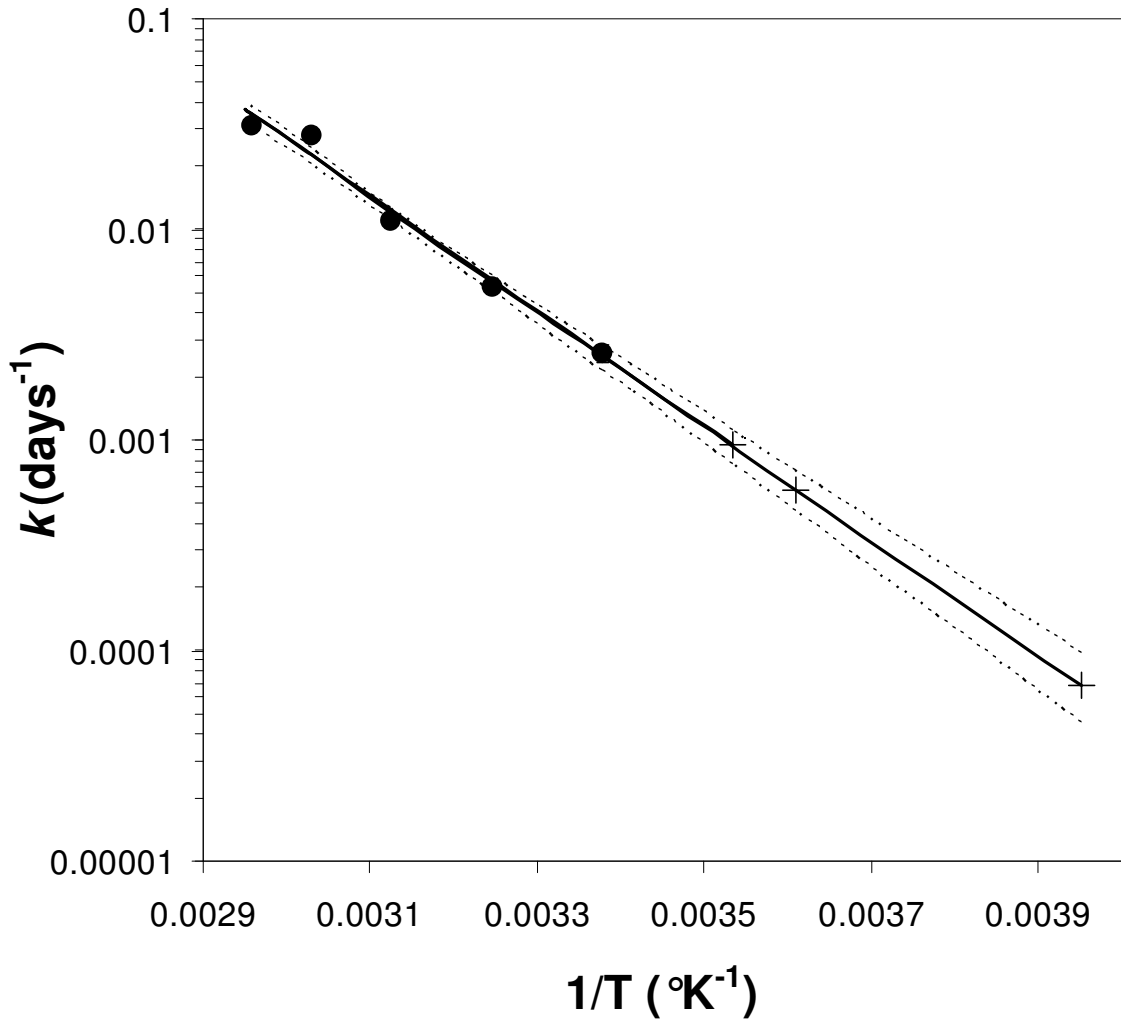

Supplement: MOESM7 [file 9547964]
